# Supplementary material
Source: PubMed Central journal article supplement (PMC7386839)

# THE LANCET

## Infectious Diseases

### Supplementary appendix

This appendix formed part of the original submission and has been peer reviewed.  
We post it as supplied by the authors.

Supplement to: Grillo F, Barisione E, Ball L, Mastracci L, Fiocca R. Lung fibrosis: an undervalued finding in COVID-19 pathological series. *Lancet Infect Dis* 2020; published online July 28. [https://doi.org/10.1016/S1473-3099\(20\)30582-X](https://doi.org/10.1016/S1473-3099(20)30582-X).

## FIGURE LEGEND

**Figure 1: Microphotograph of lung parenchyma with marked fibrosis and re-modeling from a COVID-19 post mortem cryobiopsy.**

A) Haematoxylin and eosin stained section showing marked fibrosis of lung parenchyma as well as microhoney-combing, squamous metaplasia (asterisk), fibroblast proliferation and obliteration/remodeling of air-spaces. B) Double staining with trichrome showing fibrosis in blue while epithelial cells are immunostained with cytokeratin 7 in brown. Scale bar: 50  $\mu$ m. Magnification x 20.

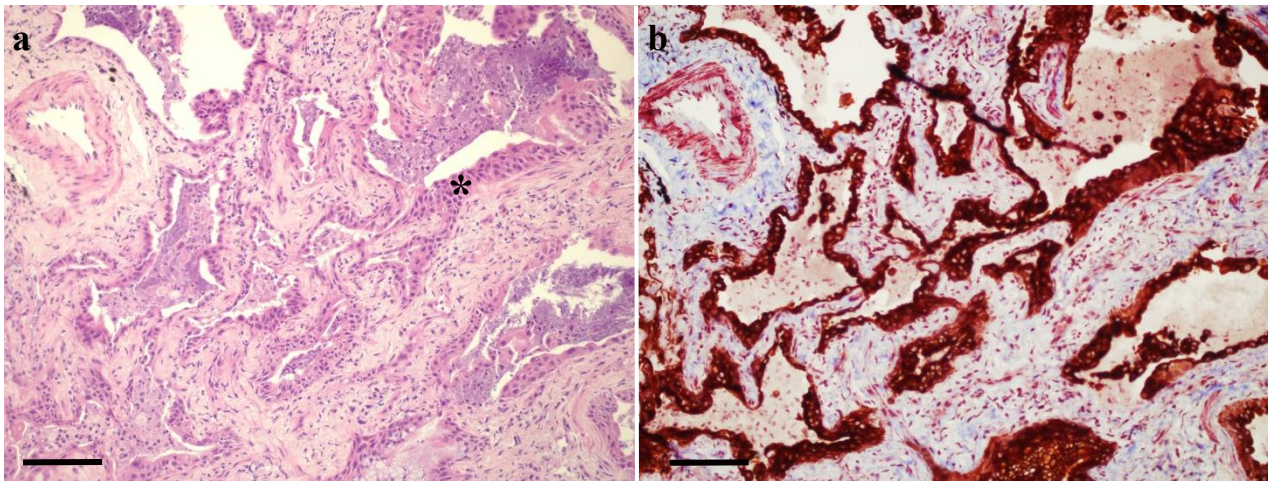

Supplement: mmc1.pdf [file mmc1.pdf]
